# Supplementary material for: Evaluation of Cardiac Repolarization in the Randomized Phase 2 Study of Intermediate- or High-Risk Smoldering Multiple Myeloma Patients Treated with Daratumumab Monotherapy
Source: Springer Nature journal article supplement (doi:10.1007/s12325-020-01601-w), 2021-01-20
Supplement: MOESM1 [file 18783498]

## SUPPLEMENTARY MATERIALS

### **Evaluation of Cardiac Repolarization in the Randomized Phase 2 Study of Intermediate- or High-Risk Smoldering Multiple Myeloma Patients Treated with Daratumumab Monotherapy**

Ajai Chari • Markus Munder • Katja Weisel • Matthew Jenner • Ceri Bygrave • Maria Teresa Petrucci • Mario Boccadoro • Michele Cavo • Niels W.C.J. van de Donk • Mehmet Turgut • Fatih Demirkan • Ihsan Karadogan • Edward Libby • Robert Kleiman • Steven Kuppens • Rajesh Bandekar • Tobias Neff • Christoph Heuck • Ming Qi • Pamela L. Clemens • Hartmut Goldschmidt

## **SUPPLEMENTARY METHODS**

### **1.1 Additional Exclusion Criteria**

Patients with renal insufficiency, anemia, and primary systemic AL (immunoglobulin light chain) amyloidosis were excluded from the study.

### **1.2 Electrocardiogram Interval Duration Assessment**

Interval duration measurements of RR, PR, QRS, and QT were collected using computer-assisted caliper placements on 3 consecutive beats. Trained analysts reviewed all electrocardiograms (ECGs) for correct lead and beat placement and adjudicated the pre-placed algorithm calipers as necessary using a proprietary validated electronic caliper system applied on a computer screen (manual adjudication methodology). A cardiologist then verified the interval durations and performed the morphology analysis. The ECG interval duration measurements were performed in Lead II, Lead V5 when Lead II was not analyzable, Lead V2 when Lead V5 was not analyzable, followed by the most appropriate lead.

### **1.3 Statistical Analysis**

#### *1.3.1 ECG Central Tendency Analysis*

The ECG analysis was based on defining the central tendency of all ECG interval parameter changes (heart rate, PR, QRS, QT, and QT interval corrected by Fridericia's formula [QTcF]) as a change from baseline. A mixed effects general linear model was fit with QTc as the dependent variable, scheduled time point of measurement as the fixed effect, and patient as a random effect. Using the means and intrapatient variance obtained from this model, 2-sided 90% confidence intervals (CIs) were calculated for the difference in the mean QTc from baseline at each

scheduled time point. An effect on QTc was ruled out if the upper bound of the 90% CI for the difference in means between the post-baseline QTc (at each time point) and baseline QTc was <20 ms. Descriptive statistics were used to summarize the ECG variable parameters and the corresponding changes from the mean baseline to each time point for the time-point analysis. Two-sided 90% (1-sided 95%) CIs were produced for the change from baseline data.

Two sets of time-matched analyses were performed using different definitions of baseline. For the primary time-matched by time-point analyses, the baseline was defined as the mean of the ECG interval duration and heart rate measurements of the triplicate ECGs, recorded either at Screening or Cycle 1 Dose 1 pre-dose, which most closely matched the clock time of each set of the Cycle 1 Dose 1 end of infusion (EOI) and Cycle 1 Dose 8 ECGs. It was possible that, for a specific patient, different baselines might be used for each of the on-treatment ECG time points (Cycle 1 Dose 1 EOI, Cycle 1 Dose 8 pre-dose, Cycle 1 Dose 8 EOI, and Cycle 1 Dose 8 1 hour after EOI). For the by time-point analyses, the baseline ECGs were compared to each time point separately for all ECG intervals.

### *1.3.2. Outlier Analyses*

The outlier analysis supplements the central tendency analysis by determining if patients had an exaggerated effect on any ECG interval that would not be revealed in a mean change from baseline central tendency analysis. Criteria defined for these analyses included heart rate, PR interval, QRS interval, QT interval, and QTcF. The categorical outlier analysis was exploratory, and data are presented as a percentage of patients who met the criteria as defined for this analysis.

### *1.3.3 Pharmacokinetic-Pharmacodynamic Analysis*

Pharmacokinetic-pharmacodynamic (PK/PD) concentration response analysis was performed using baseline-adjusted QTc ( $\Delta$ QTcF), serum concentration of daratumumab, and time [1]. The primary endpoint was change from baseline in QTcF. For the primary analysis, a time-matched baseline was used, as described for the central tendency analyses. A negative result (ie, no evidence of a QTc prolongation) was defined as a model based upper bound of the 2-sided 90% CI of the predicted mean  $\Delta$ QTcF  $<20$  ms at the observed mean  $C_{\max}$  for the therapeutic dose of daratumumab.

### *1.3.4 Sensitivity Analyses*

As a sensitivity analysis, central tendency, outlier, and PK/PD analyses were repeated using a time-averaged baseline. Baseline was defined as the mean of the measurement values of the up to 3 ECGs recorded pre-dose at Cycle 1 Dose 1. For any patients who did not have any Cycle 1 Dose 1 pre-dose ECGs, the baseline for this sensitivity analysis was instead the mean of the measurement values of the Screening ECGs that most closely matched the clock time of the Cycle 1 Dose 1 EOI ECGs. For the outlier sensitivity analyses, the maximum change from baseline values were compared to the subject's time-averaged baseline mean value. PK/PD sensitivity analysis used the time-averaged baseline to calculate a change from baseline, and this was matched to the concentration sample after the start of dosing.

## Reference

1. Garnett C, Needleman K, Liu J, Brundage R, Wang Y. Operational characteristics of linear concentration-QT models for assessing QTc interval in the thorough QT and phase I clinical studies. *Clin Pharmacol Ther.* 2016;100:170–178

**Supplementary Table 1** Institutional Review Boards or Ethics Committees at Each CENTAURUS Study Site

| <b>Region</b>         | <b>Institutional Review Board/Ethics Committee</b>                                                                                       |
|-----------------------|------------------------------------------------------------------------------------------------------------------------------------------|
| <b>Australia</b>      | Alfred Health Human Ethics Committee<br>55 Commercial Rd<br>Melbourne, VIC, 3004<br>Australia                                            |
|                       | Monash Health<br>246 Clayton Rd<br>Clayton, Victoria, 3168<br>Australia                                                                  |
|                       | Central Adelaide Local Health Network<br>Level 4 Womens Health Centre<br>North Terrace, SA, 5000<br>Australia                            |
|                       | Concord Repatriation General Hospital Research Office<br>Building 20 Hospital Road<br>Concord, NSW, 2139<br>Australia                    |
|                       | Eastern Health Human Research Ethics Committee<br>Arnold Street Level 2 Number 5<br>Box Hill, Victoria, 3128<br>Australia                |
| <b>Canada</b>         | UHN Research Ethics Board<br>700 University Avenue Hydro Building, 10th Floor Suite 1056<br>Toronto, Ontario, M5G 1Z5<br>Canada          |
|                       | Health Research Ethics Board of Alberta Clinical Trials Committee<br>1500, 10104 - 103 Avenue NW<br>Edmonton, Alberta, T5J 4A7<br>Canada |
| <b>Czech Republic</b> | Lokální Etická komise FN Brno<br>Etická komise Fakultní nemocnice Brno Jihlavská 20<br>BRNO, N/A, 625 00<br>Czech Republic               |
| <b>France</b>         | CPP OUEST I<br>Hopital Bretonneau service de Radiologie Batiment B1A<br>Tours, 37044<br>France                                           |
|                       | CPP Tours - Région Centre (Ouest-1)<br>Département de Radiologie                                                                         |

|                      |                                                                                                                                                                                                             |
|----------------------|-------------------------------------------------------------------------------------------------------------------------------------------------------------------------------------------------------------|
|                      | <p>Adultes - Bât. B1A Hôpital<br/>Bretonneau - CHRU TOURS<br/>Tours Cedex 9, 37044<br/>France</p>                                                                                                           |
| <b>Germany</b>       | <p>Ethikkommission der<br/>Medizinischen Fakultät der<br/>Universität Heidelberg<br/>Alte Glockengießerei 11/1<br/>Heidelberg, 69115<br/>Germany</p>                                                        |
|                      | <p>Ethik-Kommission der<br/>Medizinischen Fakultät der<br/>Universität Duisburg-Essen<br/>Robert-Koch-Str. 9-11 Ethik-<br/>Kommission der Med. Fakultät<br/>d. Universität<br/>Essen, 45147<br/>Germany</p> |
|                      | <p>Landesamt für Gesundheit und<br/>Soziales, Geschäftsstelle der<br/>Ethik-Kommission des Landes<br/>Berlin<br/>Fehrbelliner Platz 1<br/>BERLIN, 10707<br/>Germany</p>                                     |
|                      | <p>Ethikkommission der Landesärztekammer<br/>Rheinland-Pfalz<br/>Deutschhausplatz 3<br/>Mainz, 55116<br/>Germany</p>                                                                                        |
|                      | <p>Ethikkommission an der Med.<br/>Fakultät der Eberhard-Karls-<br/>Universität Tübingen<br/>Gartenstr. 47<br/>Tübingen, 72074<br/>Germany</p>                                                              |
|                      | <p>Ethikkommission bei der<br/>Bayerischen<br/>Landesärztekammer<br/>Mühlbaurstr. 16<br/>München, 81677<br/>Germany</p>                                                                                     |
| <b>Great Britain</b> | <p>Ethikkommission der<br/>Sächsischen<br/>Landesärztekammer<br/>Schützenhöhe 16-18<br/>Dresden, 01099<br/>Germany</p>                                                                                      |
|                      | <p>West Midlands - Edgbaston<br/>Research Ethics Committee<br/>The Old Chapel Royal Standard<br/>Place<br/>Nottingham, NG1 6FS<br/>Great Britain</p>                                                        |

|               |                                                                                                                                                                                                      |
|---------------|------------------------------------------------------------------------------------------------------------------------------------------------------------------------------------------------------|
| <b>Israel</b> | Helsinki Committee - Rabin<br>Medical Center<br>Jabotinsky 39 Street P.O. Box 85<br>Beilinson Campus<br>Petach-Tikva, 35254<br>Israel                                                                |
|               | Helsinki committee - Rambam<br>MC<br>Rambam Medical Center 8<br>Haaliya Hashniya street Bat<br>Galim<br>Haifa, 31096<br>Israel                                                                       |
|               | Helsinki Committee - Sourasky<br>Medical Center<br>6 Weizman Street<br>Tel Aviv, 64239<br>Israel                                                                                                     |
|               | Helsinki Committee (IRB) of<br>Hadassah Medical Organization<br>Kiryat Hadassah Jerusalem<br>Jerusalem<br>Israel                                                                                     |
| <b>Italy</b>  | COMITATO ETICO<br>DELL'AZIENDA<br>POLICLINICO UMBERTO I<br>DI ROMA<br>Viale Policlinico 155 N/A N/A<br>Roma, RM, 00161<br>Italy                                                                      |
|               | Comitato Etico Regione Liguria<br>c/o IRCCS Az. Ospedaliera<br>Universitaria San Martino IST<br>Istituto Nazionale per la Ricerca<br>sul Cancro Largo Rosanna<br>Benzi, 10<br>Genova, 16132<br>Italy |
|               | COMITATO ETICO<br>INTERAZIENDALE AOU<br>CITTA' DELLA SALUTE E<br>DELLA SCIENZA DI TORINO<br>Corso Bramante 88/90<br>Dipartimento di Oncologia<br>Medica<br>Torino, TO, 10126<br>Italy                |
|               | COMITATO ETICO<br>INDIPENDENTE<br>DELL'AZIENDA<br>OSPEDALIERO UNIVERSITARIO<br>POLICLINICO S. ORSOLA-MALPIGHI<br>VIA MASSERENTI 9<br>BOLOGNA, 40138                                                  |

|                        |                                                                                                                                                                                                                                                                                                                                                                                                                                                                                                                                                                                                                                                                                                                                     |
|------------------------|-------------------------------------------------------------------------------------------------------------------------------------------------------------------------------------------------------------------------------------------------------------------------------------------------------------------------------------------------------------------------------------------------------------------------------------------------------------------------------------------------------------------------------------------------------------------------------------------------------------------------------------------------------------------------------------------------------------------------------------|
|                        | Italy                                                                                                                                                                                                                                                                                                                                                                                                                                                                                                                                                                                                                                                                                                                               |
| <b>The Netherlands</b> | Medisch Ethische<br>Toetsingscommissie VU<br>Medisch Centrum<br>de Boelelaan 1117<br>AMSTERDAM, N/A, 1081 HV<br>Netherlands                                                                                                                                                                                                                                                                                                                                                                                                                                                                                                                                                                                                         |
| <b>Russia</b>          | Independent Interdisciplinary<br>Committee on Ethics Expertise<br>of Clinical Trials<br>51 Leningradsky prospect<br>Moscow, 125468<br>Russia                                                                                                                                                                                                                                                                                                                                                                                                                                                                                                                                                                                        |
| <b>Turkey</b>          | On Dokuz Mayıs Üniversitesi<br>Tıp Fakültesi Klinik<br>Araştırmalar Etik Kurulu<br>On Dokuz Mayıs Üniversitesi<br>Tıp Fakültesi 1. Kat Özel servis<br>karşısı<br>SAMSUN<br>Turkey                                                                                                                                                                                                                                                                                                                                                                                                                                                                                                                                                   |
| <b>United States</b>   | University of Pennsylvania<br>Office of Regulatory Affairs<br>IRB<br>3624 Market Street - ST. 301-S<br>Suite 301 S<br>Philadelphia, PA, 19104<br>USA<br>Washington University in St.<br>Louis Human Research<br>Protection Office<br>660 S. Euclid Avenue., Box<br>8089 Human Research<br>Protection Office (IRB)<br>St. Louis, MO, 63110<br>USA<br>Memorial Sloan-Kettering<br>Cancer Center IRB/Privacy<br>Board<br>1275 York Avenue<br>New York, NY, 10065<br>USA<br>Western Institutional Review<br>Board<br>3535 Seventh Avenue SW<br>Olympia, WA, 98502<br>USA<br>BRANY (Biomedical Research<br>Alliance of New York)<br>1981 Marcus Ave Suite 210<br>Lake Success, NY, 11041<br>USA<br>Western Institutional Review<br>Board |

|                                                                                                                                                                                                                               |
|-------------------------------------------------------------------------------------------------------------------------------------------------------------------------------------------------------------------------------|
| 1019 39th Ave. SE Suite 120<br>Puyallup, WA, 98374<br>USA                                                                                                                                                                     |
| IRBMED, University of<br>Michigan<br>2800 Plymouth Rd Building<br>200, Room 2086<br>Ann Arbor, MI, 48109<br>USA                                                                                                               |
| Dana-Farber Cancer Institute<br>IRB<br>450 Brookline Ave. OS-229<br>Boston, MA, 02215<br>USA                                                                                                                                  |
| Emory University IRB<br>1599 Clifton Road NE 5th Floor<br>Atlanta, GA, 30322<br>USA                                                                                                                                           |
| Mayo Clinic IRB<br>200 First Street S W / 20<br>Rochester, MN, 55905<br>USA                                                                                                                                                   |
| NYU School of Medicine IRB<br>550 1ST Ave N/A N/A<br>New York, NY, 10016<br>USA                                                                                                                                               |
| University of Arkansas for<br>Medical Sciences IRB<br>Institutional Review Board<br>Office of Reserach and<br>Sponsored Programs Sherman<br>Allen, Ph.D., Chairman 4301<br>West Markham,#636<br>Little Rock, AK, 72205<br>USA |
| The University of North<br>Carolina of Chapel Hill<br>Office of Human Research<br>Ethics Medical Building 52<br>Mason Farm Road, CB#7097<br>Chapel Hill, NC, 27599<br>USA                                                     |

*IRB* institutional review board.

**Supplementary Table 2** Mean change from baseline in QTcF interval by timepoint

| <b>Time point</b>      | <b>n</b> | <b>QTcF Change<br/>from Baseline (ms)</b> | <b>90% Confidence<br/>Interval (ms)</b> |
|------------------------|----------|-------------------------------------------|-----------------------------------------|
| C1D1 Post-infusion     | 27       | 9.1                                       | 4.1-14.1                                |
| C1D8 Pre-infusion      | 29       | 0.3                                       | -4.3-4.9                                |
| C1D8 Post-infusion     | 28       | 6.9                                       | 3.2-10.6                                |
| C1D8 1 h Post-infusion | 27       | 7.4                                       | 2.7-12.1                                |

*QTcF interval* QT interval corrected for heart rate using Fridericia's formula, *C* cycle, *D* day.
